# Supplementary material for: Staphylococcus aureus protein SAUGI acts as a uracil-DNA glycosylase inhibitor
Source: PubMed Central journal article supplement — Nucleic Acids Res. 2013 Oct 21;42(2):1354–64. doi: 10.1093/nar/gkt964 (PMC3902945; doi:10.1093/nar/gkt964), 2013-10-21
Supplement: supp_gkt964_nar-01810-z-2013-File010.pdf [file supp_gkt964_nar-01810-z-2013-File010.pdf]

## Supplementary data

Table S1. Properties of DNA mimic proteins

| <b>DNA mimic protein</b> | <b>PDB number</b> | <b>No. of NCRs<sup>a</sup></b> | <b>No. of NCRs on surface<sup>b</sup></b> | <b>No. of residues on surface<sup>b</sup></b> | <b>Percentage of NCRs on surface</b> | <b>Protein size (total residues)</b> |
|--------------------------|-------------------|--------------------------------|-------------------------------------------|-----------------------------------------------|--------------------------------------|--------------------------------------|
| DinI                     | 1GHH              | 13                             | 12                                        | 65                                            | 18%                                  | 81                                   |
| HI1450                   | 1NNV              | 31                             | 30                                        | 78                                            | 38%                                  | 107                                  |
| Ocr                      | 1S7Z              | 29                             | 28                                        | 75                                            | 37%                                  | 106                                  |
| TAF II 230               | 1TBA              | 15                             | 15                                        | 58                                            | 26%                                  | 67                                   |
| UGI                      | 1UGI              | 18                             | 17                                        | 61                                            | 28%                                  | 83                                   |
| P53                      | 2B3G              | 11                             | 10                                        | 78                                            | 13%                                  | 117                                  |
| MfpA                     | 2BM4              | 25                             | 22                                        | 111                                           | 20%                                  | 180                                  |
| CarS                     | 2KSS              | 16                             | 15                                        | 65                                            | 23%                                  | 86                                   |
| Gam                      | 2UUZ              | 20                             | 19                                        | 80                                            | 24%                                  | 89                                   |
| ArdA                     | 2W82              | 37                             | 35                                        | 112                                           | 31%                                  | 163                                  |
| ICP11                    | 2ZUG              | 15                             | 14                                        | 61                                            | 23%                                  | 80                                   |
| DMP19                    | 3VJZ              | 27                             | 20                                        | 98                                            | 20%                                  | 164                                  |

<sup>a</sup> NCR: negatively charged residue

<sup>b</sup> A residue is regarded as an exposed residue on the protein surface if its relative solvent accessibility is greater than 16% (47).

Table S2. Properties of potential DNA mimic proteins

| Query protein | Identified protein | Gene name  | Description                                                      | Z-Score | RMSD (Å) | No. of aligned residues | Sequence identity (%) | No. of NCRs <sup>a</sup> | No. of NCRs on surface <sup>b</sup> | No. of residues on surface <sup>b</sup> | Percentage of NCRs on surface | Protein size (total residues) |
|---------------|--------------------|------------|------------------------------------------------------------------|---------|----------|-------------------------|-----------------------|--------------------------|-------------------------------------|-----------------------------------------|-------------------------------|-------------------------------|
| DinI          | 1OTG               | hpcD       | 5-Carboxymethyl-2-Hydroxymuconate Isomerase                      | 5.8     | 2.9      | 72                      | 13                    | 15                       | 15                                  | 93                                      | 16%                           | 125                           |
| DinI          | 2OP8               | ywhB       | Probable Tautomerase ywhB                                        | 4.1     | 1.9      | 44                      | 7                     | 13                       | 13                                  | 55                                      | 24%                           | 61                            |
| DinI          | 3E6Q               | PA1966     | Putative 5-Carboxymethyl-2-Hydroxymuconate Isomerase             | 5.6     | 2.8      | 72                      | 10                    | 17                       | 16                                  | 95                                      | 17%                           | 127                           |
| DinI          | 3MF7               | cis-caaD   | Cis-3-Chloroacrylic Acid Dehalogenase                            | 5.5     | 2.6      | 72                      | 8                     | 12                       | 11                                  | 87                                      | 13%                           | 118                           |
| DMP19         | 2J9W               | vps28      | vps28-Prov Protein                                               | 5.1     | 3.4      | 87                      | 6                     | 17                       | 16                                  | 67                                      | 24%                           | 99                            |
| Gam           | 1A7W               | hmfB       | Histone hmfB                                                     | 5.1     | 1.7      | 46                      | 9                     | 12                       | 10                                  | 60                                      | 17%                           | 68                            |
| Gam           | 1II8               | rad50      | rad50 ABC-Atpase                                                 | 4.9     | 2.4      | 57                      | 14                    | 33                       | 31                                  | 132                                     | 23%                           | 174                           |
| Gam           | 2PEO               | rbcX       | rbcX Protein                                                     | 4.1     | 3.4      | 57                      | 7                     | 15                       | 15                                  | 96                                      | 16%                           | 113                           |
| Gam           | 3B0B               | CENPX      | Centromere Protein S                                             | 5.4     | 2        | 50                      | 8                     | 13                       | 13                                  | 67                                      | 19%                           | 75                            |
| MfpA          | 2F3L               | RFR-Domain | RFR-Domain                                                       | 16.2    | 1.9      | 114                     | 16                    | 21                       | 19                                  | 81                                      | 23%                           | 132                           |
| MfpA          | 2O6W               | Rfr23      | Repeat five residue (Rfr) protein or pentapeptide repeat protein | 14.2    | 1.3      | 114                     | 18                    | 20                       | 19                                  | 99                                      | 19%                           | 147                           |
| MfpA          | 3N90               | T13E15.7   | Thylakoid luminal 15 kda protein 1, chloroplastic                | 11.8    | 2        | 90                      | 14                    | 16                       | 14                                  | 89                                      | 16%                           | 145                           |
| UGI           | 1XS0               | ivy        | Inhibitor of vertebrate lysozyme                                 | 4.6     | 3        | 66                      | 6                     | 13                       | 13                                  | 89                                      | 15%                           | 129                           |
| UGI           | 2KCD               | SSP0047    | Uncharacterized protein SSP0047                                  | 5.8     | 2.9      | 71                      | 13                    | 17                       | 17                                  | 88                                      | 19%                           | 120                           |

<sup>a</sup> NCR: negatively charged residue

<sup>b</sup> A residue is regarded as an exposed residue on the protein surface if its relative solvent accessibility is greater than 16% (47).

Table S3. Protein identification by LC-nanoESI-MS/MS.

| Band | Protein name (species)                                                                                                 | Acc. No.    | MS/mps* | Sequence coverage |
|------|------------------------------------------------------------------------------------------------------------------------|-------------|---------|-------------------|
| 1    | Preprotein translocase subunit SecA [ <i>Staphylococcus aureus</i> subsp. <i>aureus</i> MRSA252]                       | YP_040234   | 4303/95 | 68%               |
|      | DNA topoisomerase IV A subunit (GyrA/ParC) [ <i>Staphylococcus aureus</i> ]                                            | AAA73952    | 319/6   | 8%                |
| 2    | Catabolite control protein A (CcpA) [ <i>Staphylococcus aureus</i> subsp. <i>aureus</i> 55/2053]                       | ZP_05602273 | 2594/60 | 87%               |
| 3    | Acetyl-CoA carboxylase subunit beta [ <i>Staphylococcus aureus</i> subsp. <i>aureus</i> Mu50]                          | NP_372225   | 1750/30 | 69%               |
|      | 50S ribosomal protein L2 [ <i>Staphylococcus aureus</i> subsp. <i>aureus</i> Mu50]                                     | NP_372771   | 1337/32 | 68%               |
|      | Phosphosugar-binding transcriptional regulator (RpiR family) [ <i>Staphylococcus aureus</i> subsp. <i>aureus</i> Mu50] | NP_372839   | 943/13  | 48%               |
| 4    | 50S ribosomal protein L3 [ <i>Staphylococcus aureus</i> subsp. <i>aureus</i> Mu50]                                     | NP_372774   | 1514/39 | 75%               |
|      | Accessory gene regulator A (agrA) [ <i>Staphylococcus aureus</i> subsp. <i>aureus</i> Mu50]                            | NP_372563   | 1213/23 | 68%               |
|      | Two-component system response regulator (WalR/VicR) [ <i>Staphylococcus aureus</i> ]                                   | CAB65399    | 918/19  | 60%               |
|      | GTP-sensing transcriptional pleiotropic repressor (CodY) [ <i>Staphylococcus aureus</i> A9765]                         | ZP_06328220 | 764/12  | 53%               |
| 5    | 30S ribosomal protein S3 [ <i>Staphylococcus aureus</i> subsp. <i>aureus</i> Mu50]                                     | NP_372768   | 1708/78 | 76%               |
|      | DNA damage-inducible repressor (LexA) [ <i>Staphylococcus aureus</i> subsp. <i>aureus</i> Mu50]                        | NP_371863   | 762/16  | 53%               |
| 6    | Ribosomal protein S4 [ <i>Staphylococcus aureus</i> subsp. <i>aureus</i> 55/2053]                                      | YP_041184   | 1218/23 | 63%               |
|      | Uracil-DNA glycosylase [ <i>Staphylococcus hominis</i> SK119]                                                          | ZP_04059821 | 168/3   | 25%               |

\* MS/mps: Mowse Score/matched peptides.

Table S4. Hydrogen bonding interactions between SAUDG and SAUGI.

| <b>SAUDG</b> | <b>SAUGI</b> | <b>Distance (Å) between the two residues</b> |
|--------------|--------------|----------------------------------------------|
| Pro64 O      | Lys22 NZ     | 6.0 (2.8, 3.2)                               |
| Lys79 N      | Glu24 OE2    | 5.6 (2.9, 2.7)                               |
| His62 N      | Cys25 O      | 5.4 (2.7, 2.7)                               |
| His62 NE2    | Ser27 OG     | 2.8                                          |
| Ser83 N      | Glu26 OE1    | 3.1                                          |
| Tyr61 OH     | Glu26 OE1    | 5.1 (2.8, 2.3)                               |
| Ser83 OG     | Glu26 OE2    | 2.7                                          |
| Ser182 OG    | Glu26 OE2    | 5.1 (2.6, 2.5)                               |
| Gln58 OE1    | Glu29 N      | 2.7                                          |
| Gln58 NE2    | Glu29 O      | 2.8                                          |
| Arg130 NH1   | Glu29 OE1    | 3.0                                          |
| Lys159 N     | Glu30 OE1    | 2.8                                          |
| His180 N     | Glu30 OE2    | 3.0                                          |
| Arg188 NH1   | Asp33 O      | 2.7                                          |
| Arg188 NH2   | Leu36 O      | 2.8                                          |
| Ser182 OG    | Thr55 OG1    | 5.9 (2.6, 3.3)                               |
| Gln66 NE2    | Tyr57 OH     | 2.6                                          |
| Lys79 O      | Tyr57 OH     | 5.4 (2.7, 2.7)                               |
| Lys79 NZ     | Asp59 OD2    | 2.8                                          |
| Asn86 OD1    | Tyr67 OH     | 5.4 (2.9, 2.5)                               |

A single distance indicates a direct hydrogen bond. Additional distances in parentheses indicate that the bond is formed by two hydrogen bonds and mediated by a water molecule.

## Supplementary Figure Legends

**Figure S1. Potential DNA mimic proteins similar to (A) UGI, (B) DMP19, (C) DinI, (D) Gam, and (E) MfpA.** The query and selected candidate DNA mimic proteins are colored pale yellow and cyan, respectively. Carboxyl groups of aspartic acid and glutamic acid are represented by red spheres.

**Figure S2. Comparisons of SSP0047 (2KCD) and its homologs with UGI. (A) Protein structures and charge distribution (B) Amino acid sequence alignment.**

**Figure S3. A comparison of the distances between the negative spots on SSP0047 (2KCD) and B-form DNA.** The distances between the carboxyl groups on SSP0047 and the phosphate groups on B-form DNA were measured by the program PyMOL.

**Figure S4. A His-pulldown assay to find the interacting partners of SAUGI.**

When total protein extracted from *Staphylococcus aureus* was used as prey, the N-terminal His<sub>10</sub>-tagged SAUGI bait pulled down several proteins. LC-nano ESI-MS/MS identified eight DNA binding proteins from these six protein bands (see Table S3 for details).

**Figure S5. Analytical ultracentrifugation and gel filtration analysis to determine the molecular weights of SAUGI, SAUDG and the SAUGI/SAUDG complex. (A)**

The molecular weights of SAUGI, C-terminal His<sub>6</sub>-tagged SAUDG and SAUGI/C-terminal His<sub>6</sub>-tagged SAUDG complex were estimated by Superdex 75 10/300 gel filtration. The standard plot of Kav against log MW (inset) was generated by the elution volumes of the proteins ovalbumin (O; 43 kDa), carbonic anhydrase (CA; 29 kDa), RNase A (RA; 13.7 kDa) and Aprotinin (A; 6.5 kDa). The Kav of each protein (SAUGI, C-terminal His<sub>6</sub>-tagged SAUDG and SAUGI/C-terminal His<sub>6</sub>-tagged SAUDG complex) was then used to find its molecular weight. (B) For sedimentation velocity (SV) analysis using analytical ultracentrifugation, all samples were diluted to a suitable concentration (OD 280 absorption between 0.1~0.8; SAUGI: 0.2 mg/ml, SAUDG: 0.3 mg/ml and SAUGI/SAUDG complex: 0.3 mg/ml) using 30 mM Tris-HCl pH 7.4, 5% glycerol, 100 mM NaCl, 1 mM EDTA and 5 mM DTT. All analytical ultracentrifugations were performed as described in our previous studies (24, 48). The observed MWs were calculated by the program SEDFIT (<http://www.analyticalultracentrifugation.com>) using the experimental S value from the SV data. The S value of each protein peak was SAUGI: 1.792, SAUDG: 2.676 and SAUGI/SAUDG complex: 3.313. A full comparison of the theoretical and observed MW values is given in Table 2.

**Figure S6. (A) Comparison of the crystal structures of unbound UDGs from four different species and (B) the proposed DNA binding region of SAUDG as suggested by alignment with DNA-bound human UDG.** The RMSD fit is 0.726 Å for SAUDG and unbound human UDG (PDB ID: 1AKZ), 0.791 Å for SAUDG and *E.coli* UDG (PDB ID: 1LQJ), 0.484 Å for SAUDG and *B. subtilis* UDG (PDB ID: 3ZOR) and 1.493 Å for SAUDG and DNA-bound human UDG (PDB ID: 1SSP). In (A), the first circled region highlights the protruding residues Leu182 of SAUDG, Leu191 of *E. coli* UDG, Phe191 of *B. subtilis* UDG and Leu272 of human UDG. The circled regions in the right figure show the three loops (4-Pro, Gly-Ser and Leu272) that accomplish compression of the phosphates in the human UDG/DNA complex. These loops were conserved in these UDG structures.

**Figure S7. The secondary structural elements and the amino acid sequences of SAUGI (left) and SAUDG (right).** The  $\alpha$ -helices and  $\beta$ -sheets are respectively represented by cylinders and arrows, and colored red and yellow in SAUDG and cyan and magenta in SAUGI.

**Figure S8. 2FoFc maps of the three SAUGI-interacting regions of SAUDG shown**

**in Figure 3B to D.** The left stereograms (sigma level =  $1.5 \sigma$ ) show SAUDG bound in the SAUGI/SAUDG complex; the stereograms on the right (sigma level =  $1.0 \sigma$ ) show the same regions in unbound SAUDG.

**Figure S9. A comparison of the SAUDG-bound SAUGI and unbound SSP0047 from *Staphylococcus saprophyticus* (2KCD).** The two circles in the merged figure (center) highlight the two loop regions that show structural differences.

**Figure S10. Binding affinities between SAUGI and UGI to SAUDG and human UDG were determined by surface plasmon resonance.** Increasing concentrations of both uracil-DNA glycosylase inhibitors were injected to immobilized SAUDG or human UDG, and the sensograms were recorded on a BIAcore T200. The colored lines show experimentally recorded values at different concentrations, and the black lines are a fit of the data to a 1:1 Langmuir model.

**Figure S11. Conformational changes in UDGs upon binding to their respective uracil-DNA glycosylase inhibitors.** The RMSD fit is  $0.345 \text{ \AA}$  for unbound SAUDG and SAUGI-bound SAUDG,  $0.479 \text{ \AA}$  for unbound *E.coli* UDG (PDB ID: 1LQJ) and UGI-bound *E.coli* UDG (PDB ID: 1LQM),  $0.217 \text{ \AA}$  for unbound *B. subtilis* UDG



(PDB ID: 3ZOR) and p56-bound *B. subtilis* UDG (PDB ID: 1ZOQ). The most significant changes between the bound and unbound UDGs are shown in detail.

**Figure S12. A BS3 cross-linking assay suggests an interaction between SAUGI and C-terminal His-tagged *S. aureus* LEX transcription factor (SALEX).** In lane 3, the presence of a new band (asterisk) after the addition of 1 mM BS3 suggests cross-linking occurs between SAUGI and SALEX.

Supporting figures

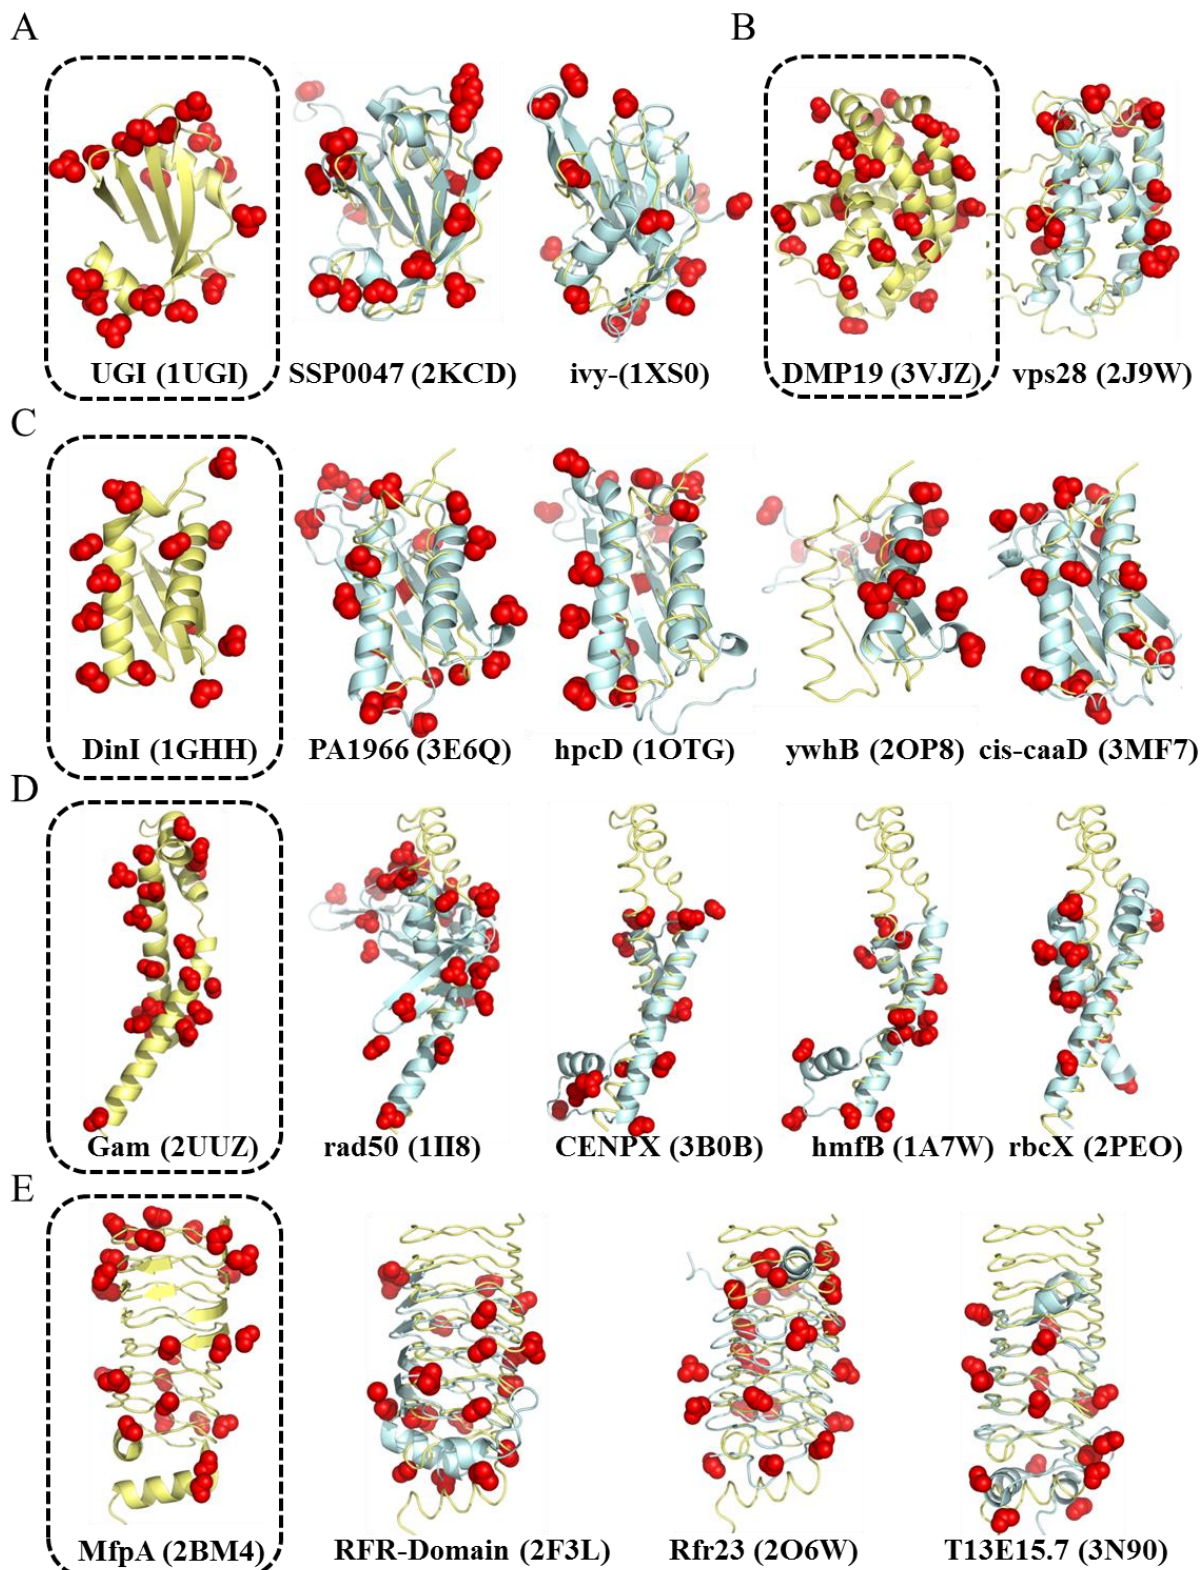

Figure S1

Figure S2 (A)

**SSP0047 (2KCD, *Staphylococcus saprophyticus*)**

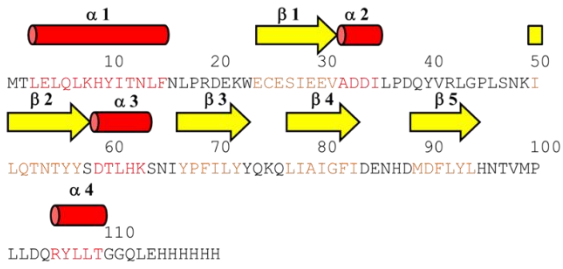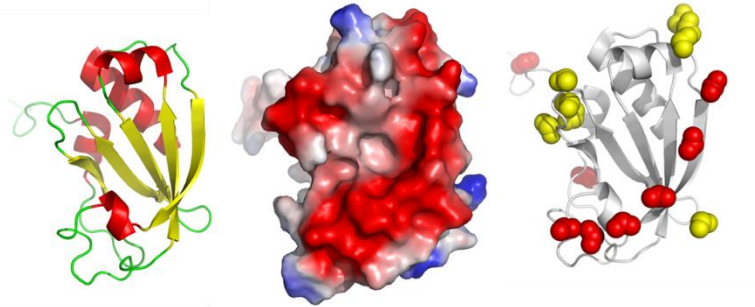

**Uracil DNA-glycosylase inhibitor (UGI, *Bacillus phage PBS2*)**

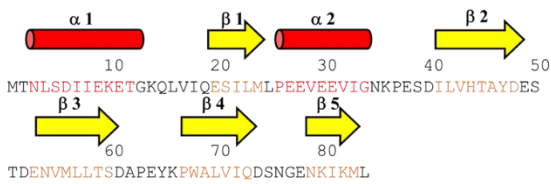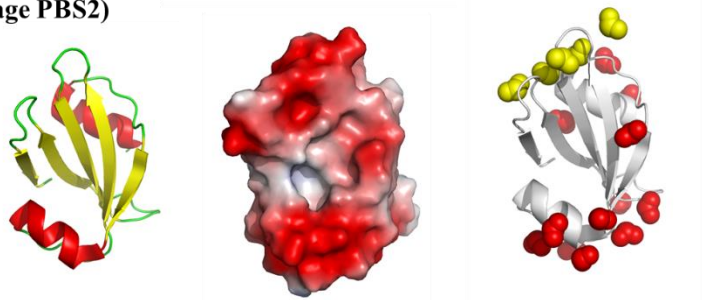

Figure S2 (B)

|                                                                 |     |              |                                                   |     |    |     |  |
|-----------------------------------------------------------------|-----|--------------|---------------------------------------------------|-----|----|-----|--|
|                                                                 |     | 10           | 20                                                | 30  | 40 | 50  |  |
| SSP0047 homologs [ <i>Staphylococcus equorum</i> ]              | 1   | MTLE         | EQQLKHYITNLFNLPKDEKWECESEIEEVADDILPEQYVRLGPLSSKI  | 50  |    |     |  |
| SSP0047 homologs [ <i>Staphylococcus epidermidis</i> ]          | 1   | MTLE         | EQQLKHYITNLFNLPKDEKWECESEIEEAADDILPEQHVRLGPLSNKI  | 50  |    |     |  |
| SSP0047 [ <i>Staphylococcus saprophyticus</i> ]                 | 1   | MTLE         | LQLKHYITNLFNLPKDEKWECESEIEEVADDILPDQYVRLGPLSNKI   | 50  |    |     |  |
| SSP0047 homologs [ <i>Staphylococcus aureus</i> ]               | 1   | MTLE         | LQLKHYITNLFNLPKDEKWECESEIEE IADDILPDQYVRLGALS -NK | 49  |    |     |  |
| Uracil-DNA glycosylase inhibitor [ <i>Bacillus phage PBS2</i> ] | 1   | -----        | MTNLSDIIEKETGKQLV IQESILMLPEEVEEVIGNKPESD         | 40  |    |     |  |
| Consensus                                                       |     |              | :*** ::..* : *:* : : : *                          |     |    |     |  |
|                                                                 |     | 60           | 70                                                | 80  | 90 | 100 |  |
| SSP0047 homologs [ <i>Staphylococcus equorum</i> ]              | 51  | LQNT         | FYSDTLHKSNIYPFILYYQKQLIAIGYIDENNDMDFLYLHNTIAP     | 100 |    |     |  |
| SSP0047 homologs [ <i>Staphylococcus epidermidis</i> ]          | 51  | LQNT         | YYSYTLHKSNIYPFILYYQKQLIAIGYIDENHDKDFLYLHNTIMP     | 100 |    |     |  |
| SSP0047 [ <i>Staphylococcus saprophyticus</i> ]                 | 51  | LQNT         | YYSDTLHKSNIYPFILYYQKQLIAIGFIDENHDMDFLYLHNTVMP     | 100 |    |     |  |
| SSP0047 homologs [ <i>Staphylococcus aureus</i> ]               | 50  | LQNT         | YYSDTLHESNIYPFILYYQKQLIAIGYIDENHDMDFLYLHNTIM-     | 98  |    |     |  |
| Uracil-DNA glycosylase inhibitor [ <i>Bacillus phage PBS2</i> ] | 41  | -----        | ILVHTAYDESTDENVMLLTSDAPEYKPWALVIQDSNGENKIKML----- | 84  |    |     |  |
| Consensus                                                       | 16  |              | : . * * : : : : : : * : * * : : *                 | 30  |    |     |  |
|                                                                 |     | 110          |                                                   |     |    |     |  |
| SSP0047 homologs [ <i>Staphylococcus equorum</i> ]              | 101 | LLDQRYLLTGGQ | 112                                               |     |    |     |  |
| SSP0047 homologs [ <i>Staphylococcus epidermidis</i> ]          | 101 | LLDQRYLLTGGQ | 112                                               |     |    |     |  |
| SSP0047 [ <i>Staphylococcus saprophyticus</i> ]                 | 101 | LLDQRYLLTGGQ | 112                                               |     |    |     |  |
| SSP0047 homologs [ <i>Staphylococcus aureus</i> ]               | 99  | LLDQRYLLTGGQ | 110                                               |     |    |     |  |
| Uracil-DNA glycosylase inhibitor [ <i>Bacillus phage PBS2</i> ] | 84  | -----        | -----                                             | 84  |    |     |  |
| Consensus                                                       |     |              |                                                   |     |    |     |  |

Figure S2

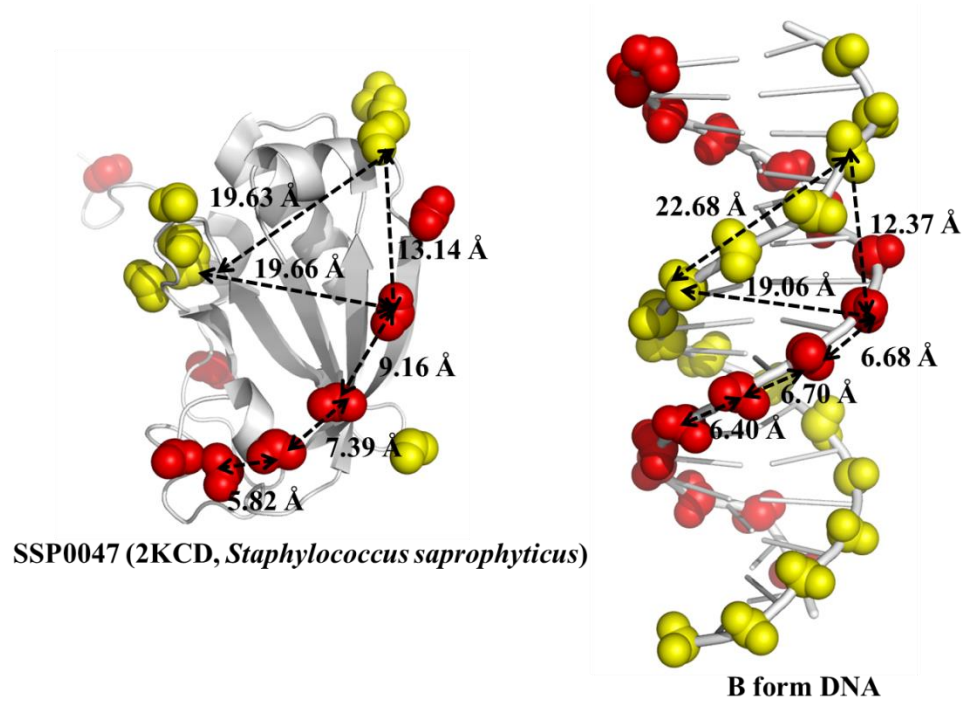

Figure S3

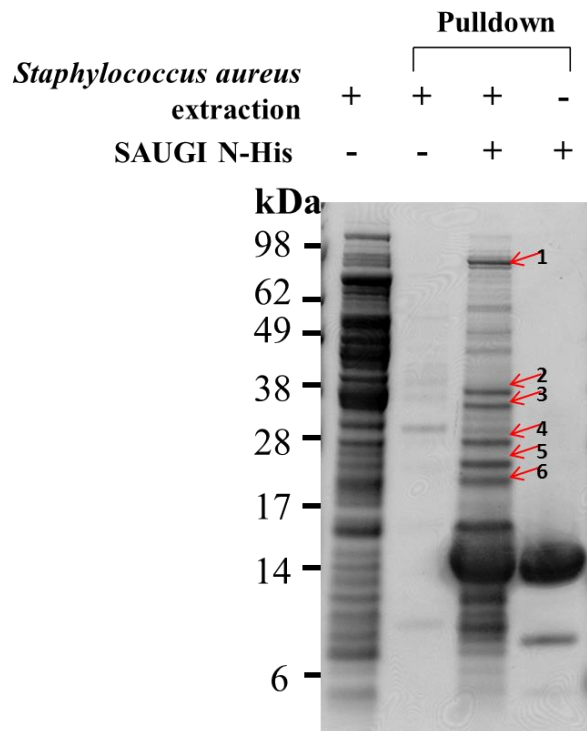

Figure S4

Figure S5 (A)

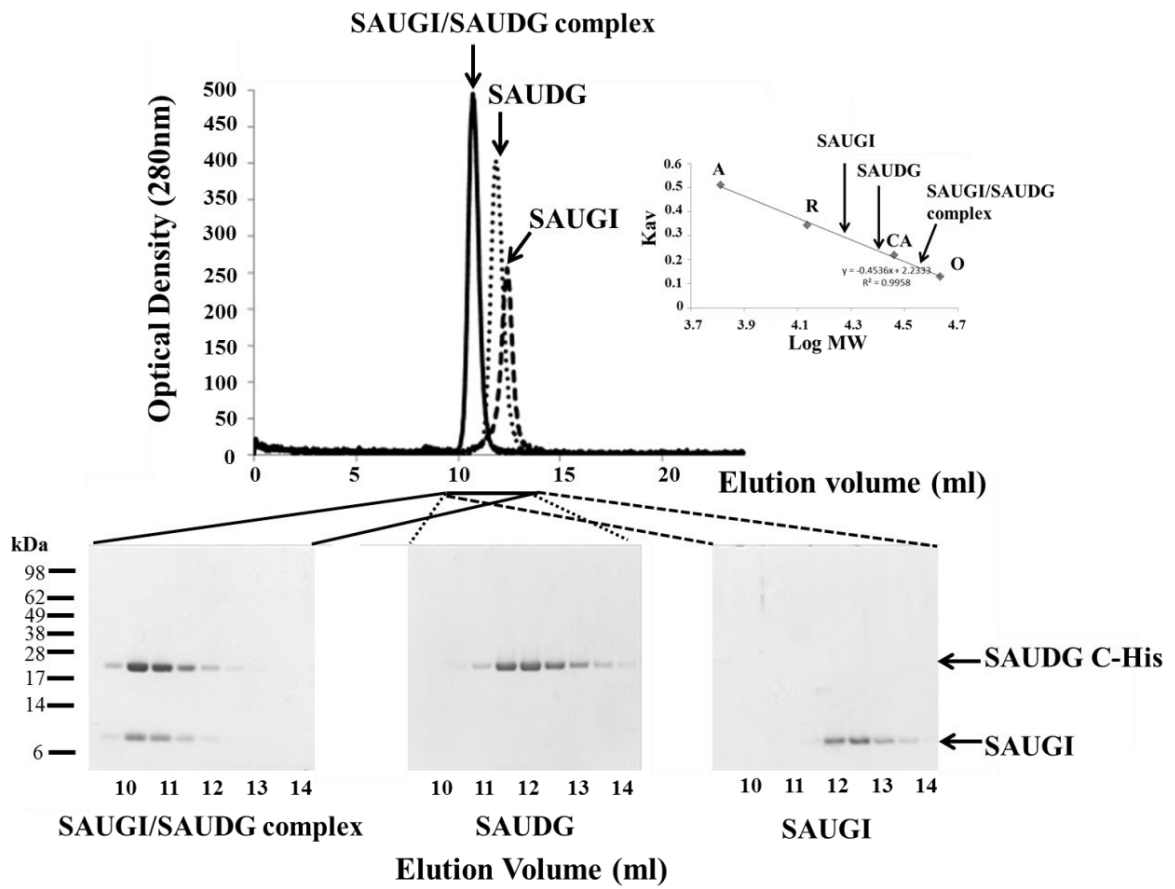

Figure S5 (B)

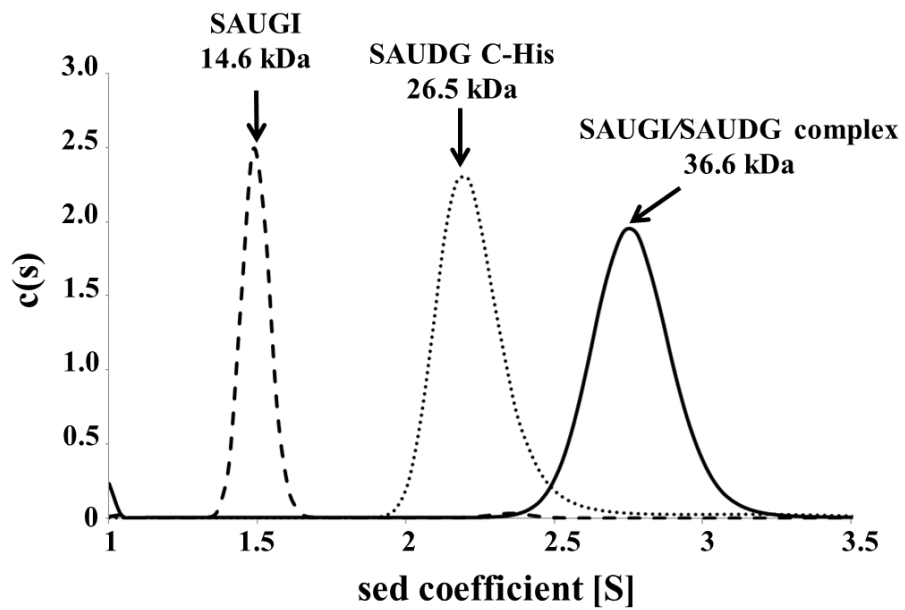

Figure S5



Figure S6 (A)

Leu184 (SAUDG)  
Leu272 (Human UDG)  
Leu191 (*E.coli* UDG)  
Phe191 (*B. subtilis* UDG)

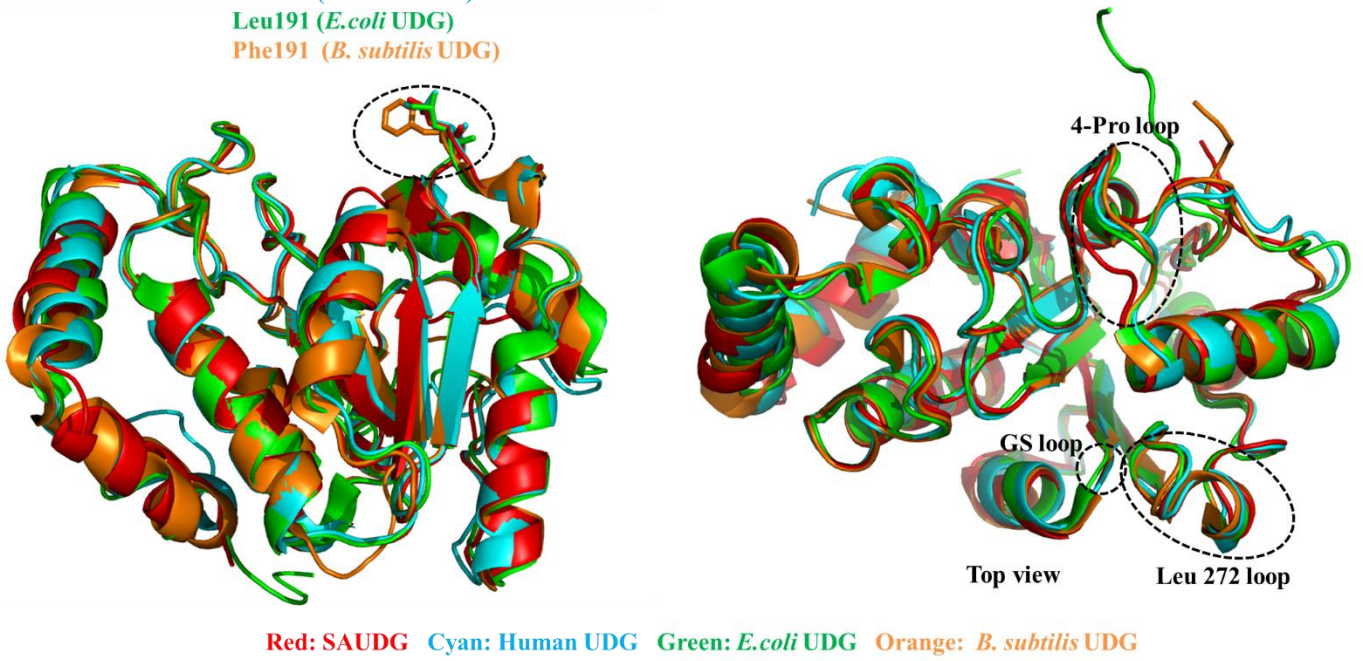

Figure S6 (B)

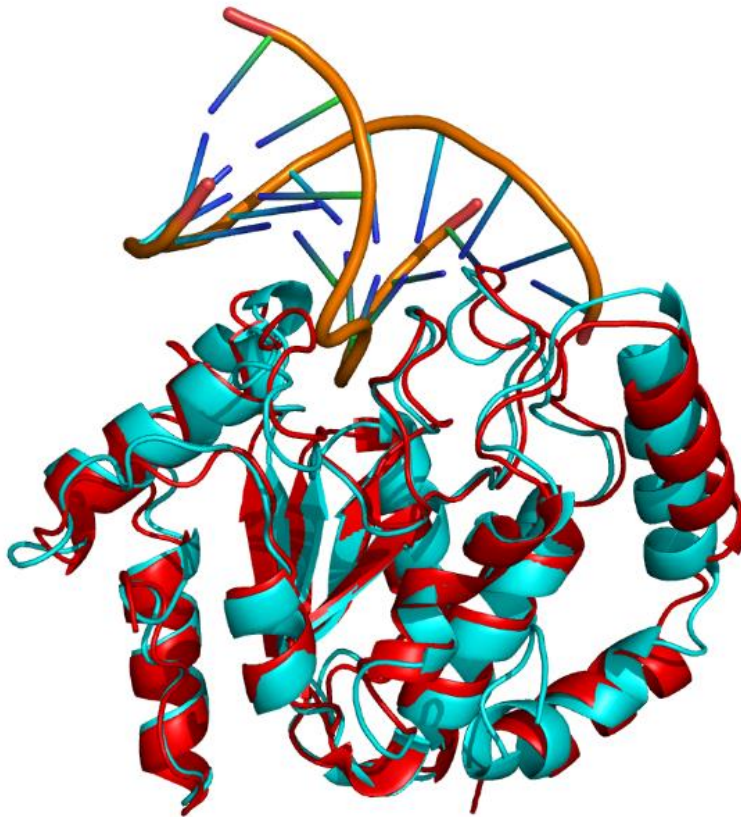

Figure S6

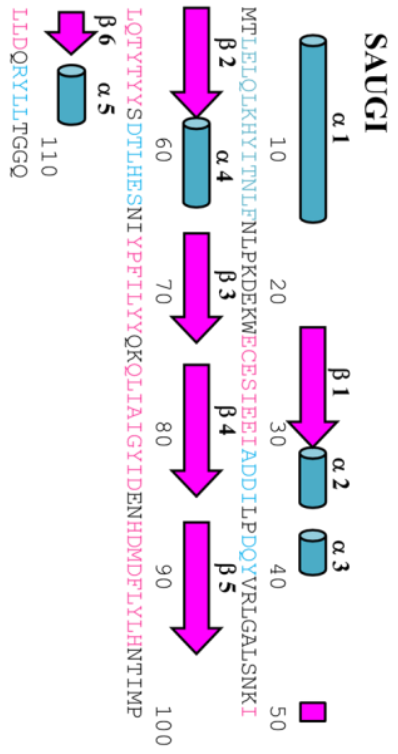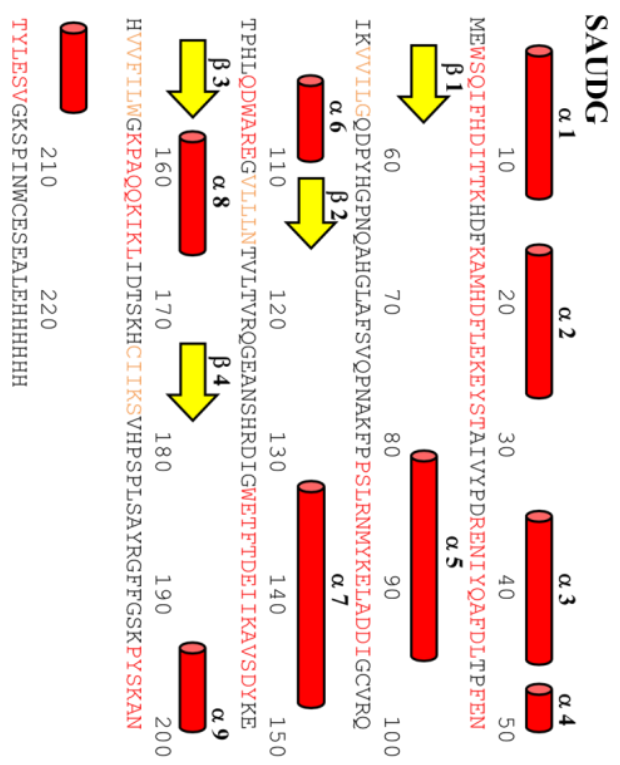

Figure S7



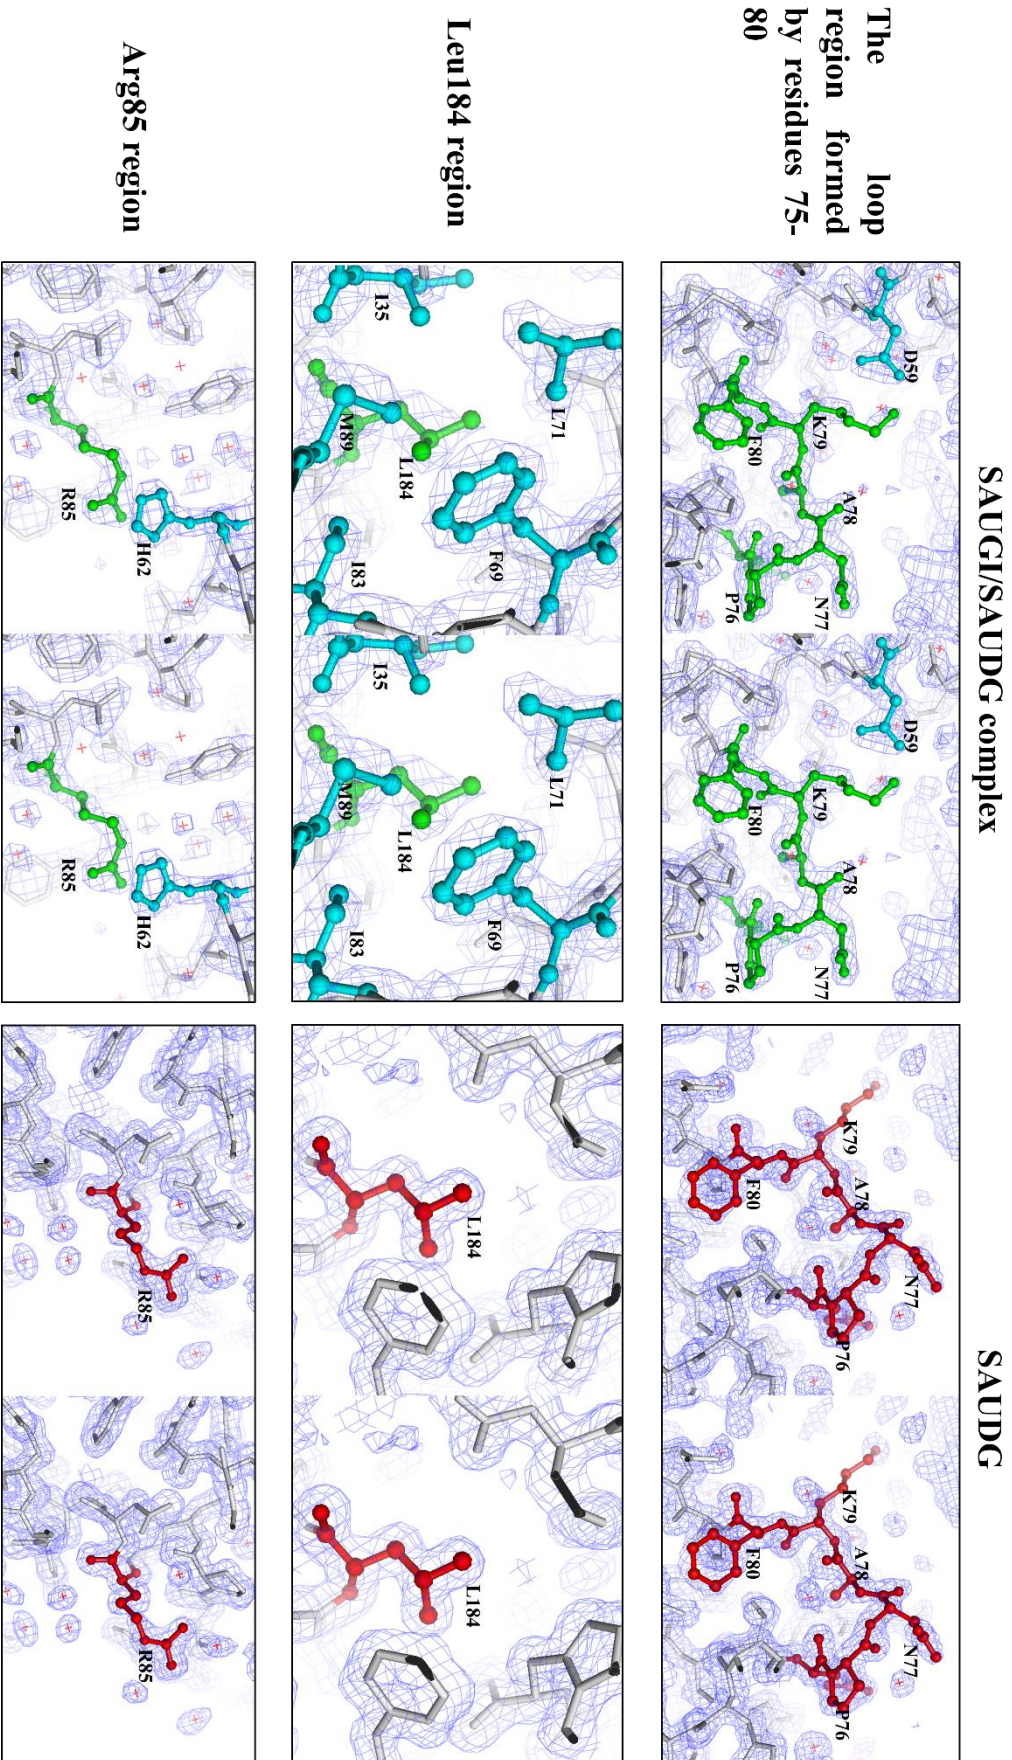

Figure S8

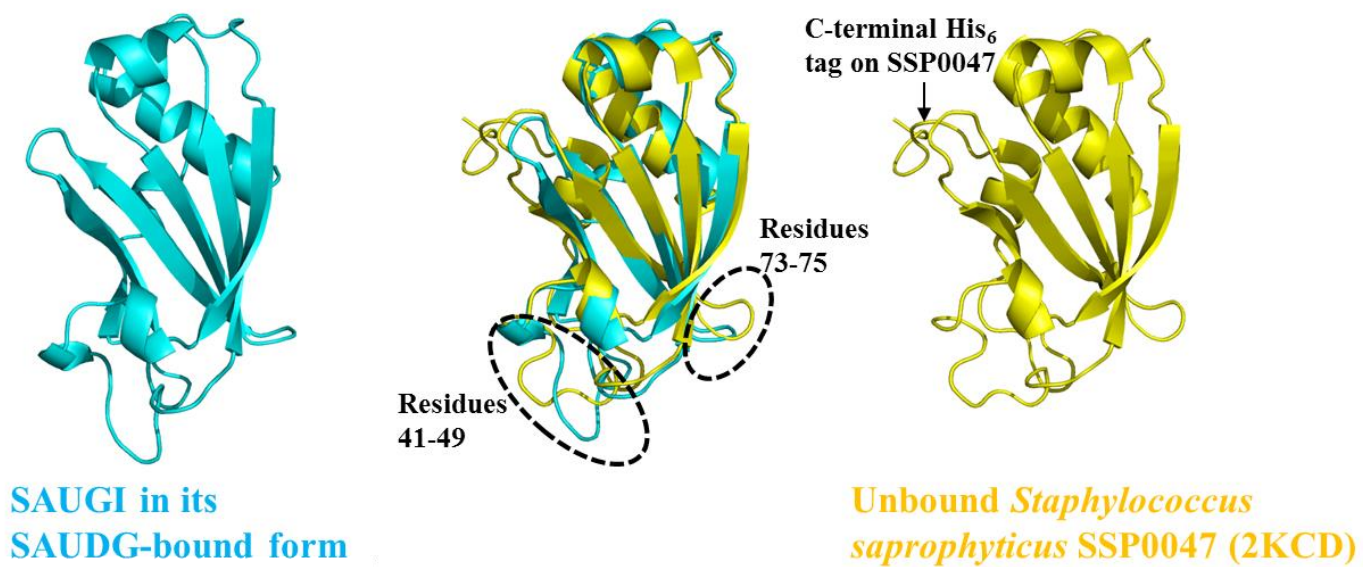

Figure S9

**SAUGI to SAUDG (KD: 1.198±0.029 nM)**

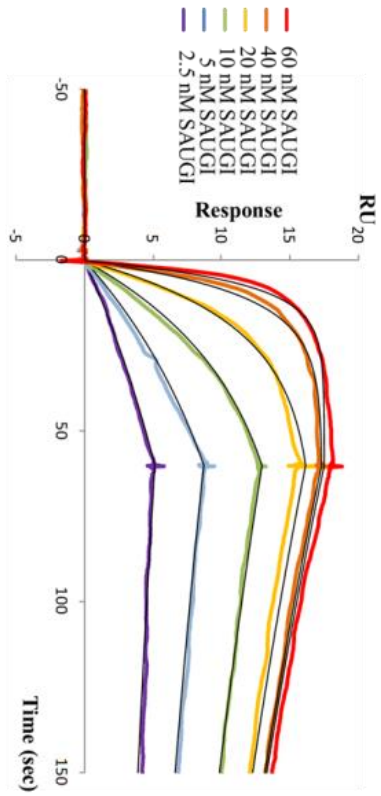

**Phage UGI to SAUDG (KD: 0.685±0.080 nM)**

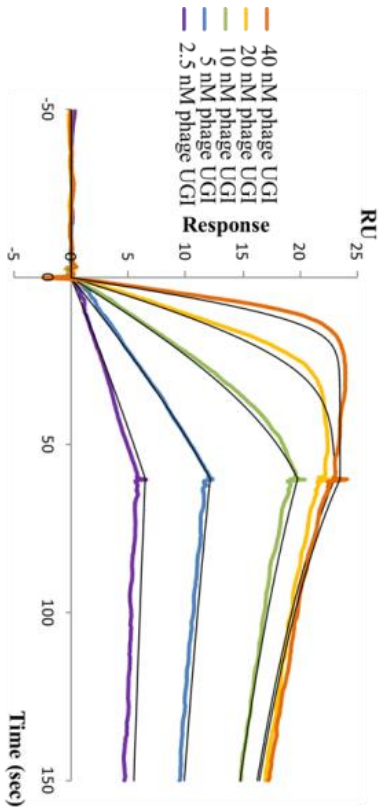

**SAUGI to human UDG (KD: 2.509±0.088 nM)**

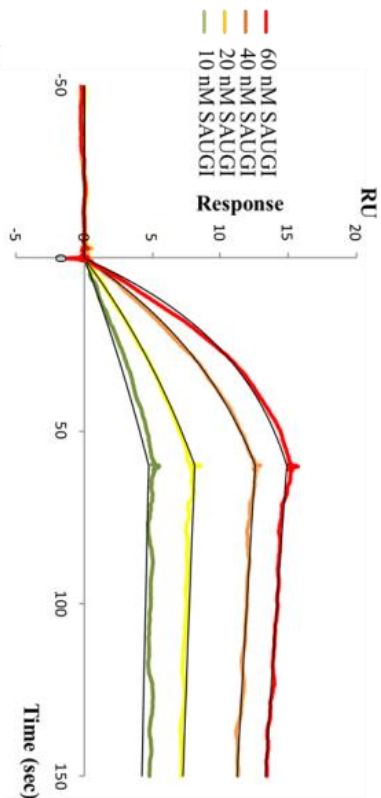

**Phage UGI to human UDG (KD: 0.189±0.021 nM)**

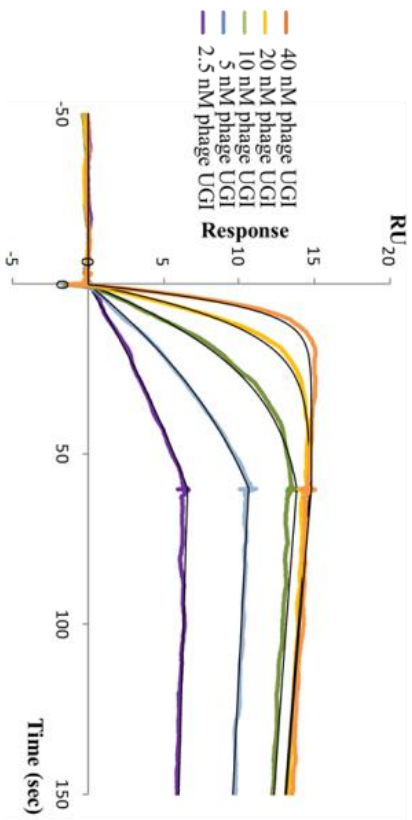

Figure S10



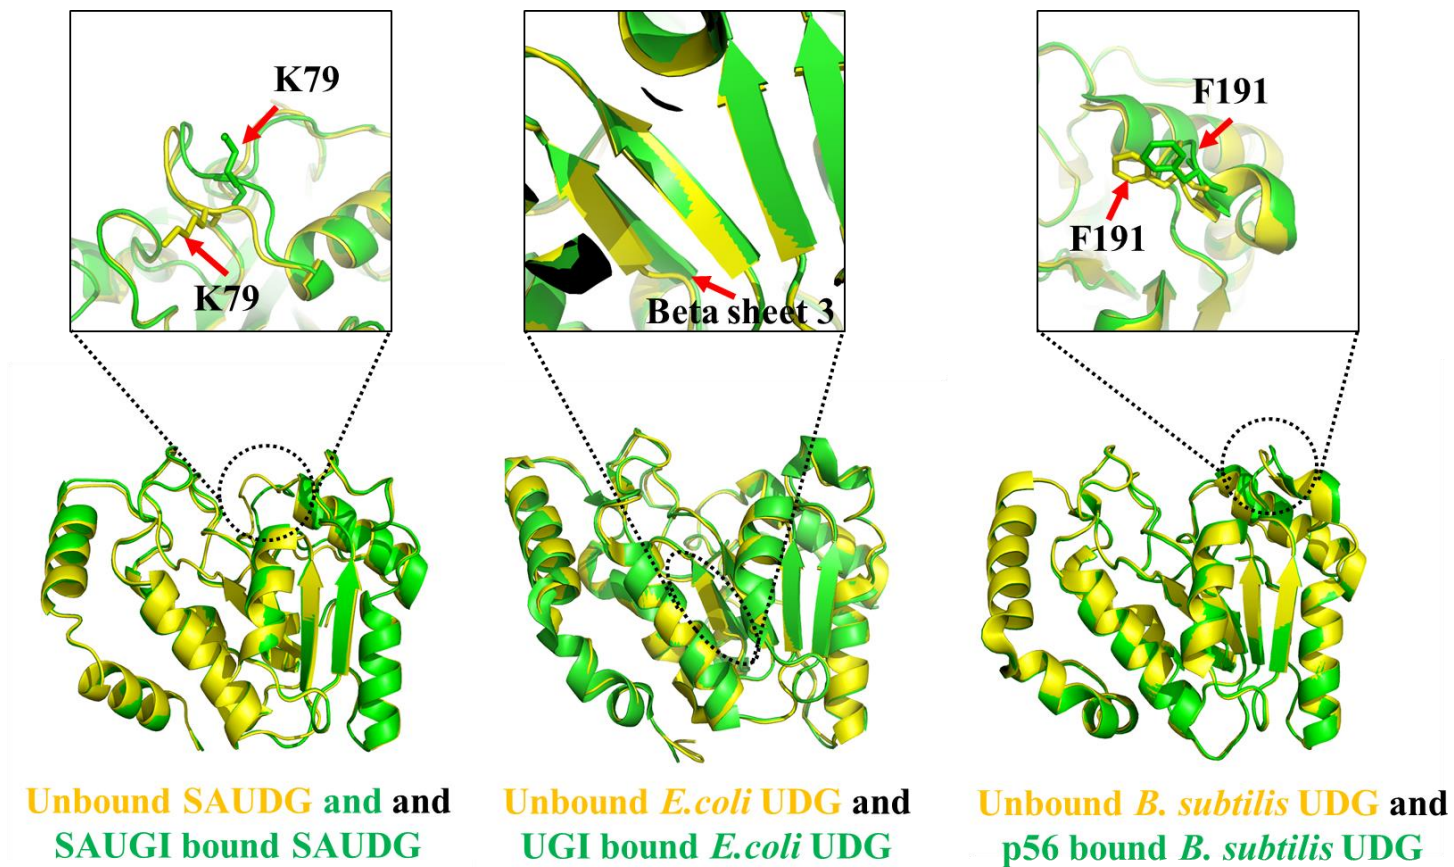

Figure S11

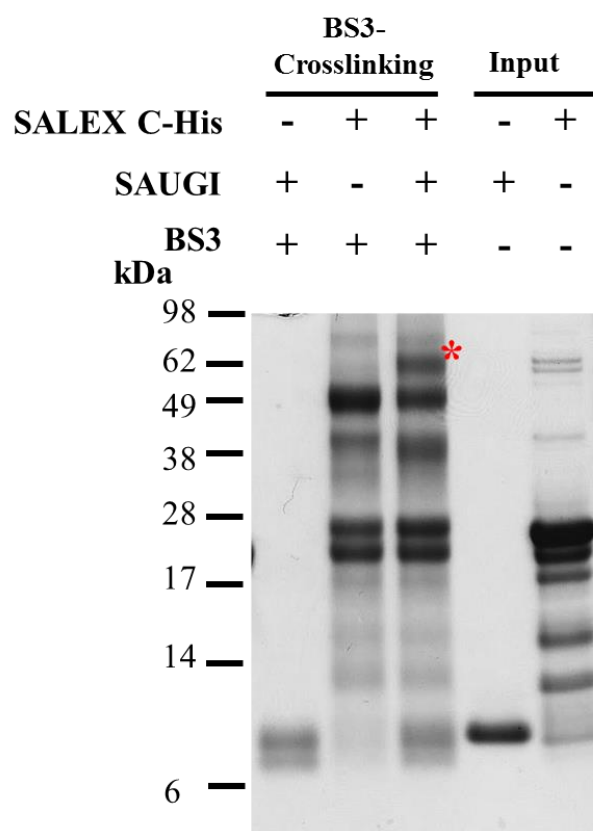

Figure S12
